# Supplementary material
Source: PubMed Central journal article supplement (PMC8023592)
Supplement: NIHMS1682937-supplement-1.pdf [file NIHMS1682937-supplement-1.pdf]

**Supplemental Table 1. Lipoprotein and Triglyceride Values for Genders with Each Group**

|                    | Health Comparison |               |          |             |          | Schizophrenia |               |          |              |          |
|--------------------|-------------------|---------------|----------|-------------|----------|---------------|---------------|----------|--------------|----------|
|                    | Males             |               | Females  |             | <i>p</i> | Males         |               | Females  |              | <i>p</i> |
|                    | <i>N</i>          | Mean (SD)     | <i>N</i> | Mean (SD)   |          | <i>N</i>      | Mean (SD)     | <i>N</i> | Mean (SD)    |          |
| HDL cholesterol    | 46                | 49.3 (11.08)  | 48       | 65.3 (14.3) | <0.001*  | 48            | 45.0 (15.2)   | 47       | 54.4 (14.0)  | 0.002*   |
| LDL cholesterol    | 46                | 112.2 (27.9)  | 48       | 97.0 (28.7) | 0.01*    | 45            | 98.0 (29.6)   | 47       | 103.9 (33.2) | 0.37     |
| Triglycerides (TG) | 46                | 127.5 (127.7) | 48       | 77.9 (37.1) | 0.01*    | 48            | 187.9 (125.8) | 47       | 124.8 (67.1) | 0.003*   |
| TG:HDL ratio       | 46                | 2.80 (2.82)   | 48       | 1.33 (1.03) | 0.001*   | 48            | 5.20 (4.75)   | 47       | 2.62 (1.9)   | 0.001*   |
| TG:LDL ratio       | 46                | 1.14 (0.93)   | 48       | 0.86 (0.45) | 0.06     | 45            | 1.81 (1.20)   | 47       | 1.29 (0.76)  | 0.01*    |

\**p* < 0.05

HDL = high-density lipoprotein; LDL = low-density lipoprotein; TG = triglycerides;
